# Supplementary material for: Perceived Social Support Moderates the Link between Attachment Anxiety and Health Outcomes
Source: PubMed Central journal article supplement (PMC3988242; doi:10.1371/journal.pone.0095358), 2014-04-15
Supplement: pone.0095358.s001.pdf [file pone.0095358.s001.pdf]

**Supplement to “Perceived Social Support Moderates the Link between Attachment Anxiety and Health Outcomes”**

This document contains of the results from our discriminant analyses with age.

**Table S1**

*Results from Mixed Models with Actor and Partner Scores on Attachment Anxiety and Avoidance, Gender, and Social Support*

*Predicting Health Outcomes, Controlling for Age*

---

| Predictor Variable   | <u>Number of Symptoms</u> | <u>Pain</u> | <u>Health Perceptions</u> | <u>Social Functioning</u> | <u>Physical Functioning</u> | <u>Role Functioning</u> | <u>Mental Health</u> |
|----------------------|---------------------------|-------------|---------------------------|---------------------------|-----------------------------|-------------------------|----------------------|
| <u>Step 1</u>        |                           |             |                           |                           |                             |                         |                      |
| Attachment Anxiety   |                           |             |                           |                           |                             |                         |                      |
| Actor                | .42**                     | .33**       | -.28**                    | -.23**                    | .03                         | -.08                    | .39**                |
| Partner              | .06                       | -.10        | -.01                      | -.06                      | .04                         | -.06                    | .10                  |
| Attachment Avoidance |                           |             |                           |                           |                             |                         |                      |
| Actor                | -.08                      | -.18        | -.06                      | .03                       | -.03                        | .05                     | .03                  |
| Partner              | -.05                      | .05         | .09                       | .10                       | -.01                        | .02                     | -.05                 |
| Gender               | -.04                      | -.02        | -.05                      | -.08                      | -.09**                      | -.05                    | -.01                 |
| Age                  |                           |             |                           |                           |                             |                         |                      |
| Actor                | -.03*                     | .01         | -.02                      | -.01                      | -.01                        | -.01                    | .01                  |
| Partner              | .02                       | .01         | .01                       | -.01                      | .01                         | .01                     | -.01                 |
| <u>Step 2</u>        |                           |             |                           |                           |                             |                         |                      |
| Social Support       |                           |             |                           |                           |                             |                         |                      |
| Actor                | -.41                      | -.01        | .29                       | .24                       | .16                         | .21                     | -.58*                |
| Partner              | -.05                      | -.42        | .24                       | -.15                      | .07                         | .03                     | -.09                 |

|                                                       |       |      |        |       |        |        |      |
|-------------------------------------------------------|-------|------|--------|-------|--------|--------|------|
| Actor Attachment<br>Anxiety × Actor Social<br>Support | .15   | .34  | -.56** | -.50* | -.29** | -.35** | .04  |
| Age                                                   |       |      |        |       |        |        |      |
| Actor                                                 | -.03* | .01  | -.02   | -.01  | -.01   | -.01   | .01  |
| Partner                                               | .02   | -.01 | .01    | -.01  | .01    | .01    | -.01 |

---

*Note.* Reported values are unstandardized regression coefficients. Significance levels are given for each predictor variable at the initial point of entry in the regression equation. Control variables were entered as predictors in both steps.

\*  $p < .05$ , \*\*  $p < .01$
